# Supplementary material for: Development of high throughput, high precision synthesis platforms and characterization methodologies for toxicological studies of nanocellulose
Source: Springer Nature journal article supplement (doi:10.1007/s10570-018-1718-2), 2018-03-03
Supplement: MOESM1 [file 15506056]

Development of high throughput, high precision synthesis platforms and characterization methodologies for nano-cellulose for toxicological studies

Georgios Pyrgiotakis1, Wing Luu2, Zhenuyan Zhang, Nachiket Vase, Glen Deloid, Laura Rubio, W. Adam C. Graham4, David C Bell3,4, Douglas Bousfield2*, and Philip Demokritou1*

1. Center for Nanotechnology and Nanotoxicology, Harvard T. H. Chan School of Public Health, Boston, MA, 07016, USA
2. Department of Chemical and Biological Engineering, University of Maine, Orono ME 04469 USA
3. Harvard John A. Paulson School of Engineering and Applied Sciences, Harvard University, Cambridge, MA, 02138
4. Center for Nanoscale Systems, Harvard University, Cambridge MA 02138

* Corresponding Authors:

Philip Demokritou, [pdemokri@hsph.harvard.edu](mailto:pdemokri@hsph.harvard.edu), tell 617-432-1381

Douglas Bousfield, [bousfld@maine.edu](mailto:bousfld@maine.edu), tell 207-581-2300


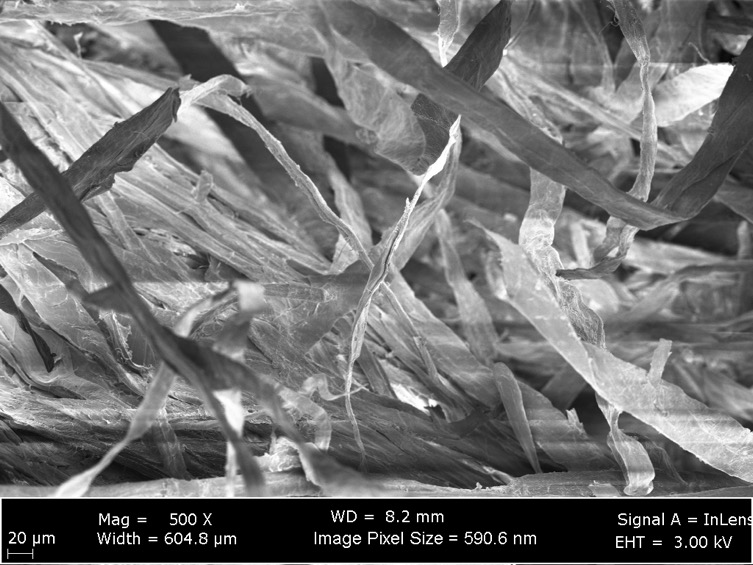


**Figure S1:** The raw cellulose fibers used for the nanocellulose productions.


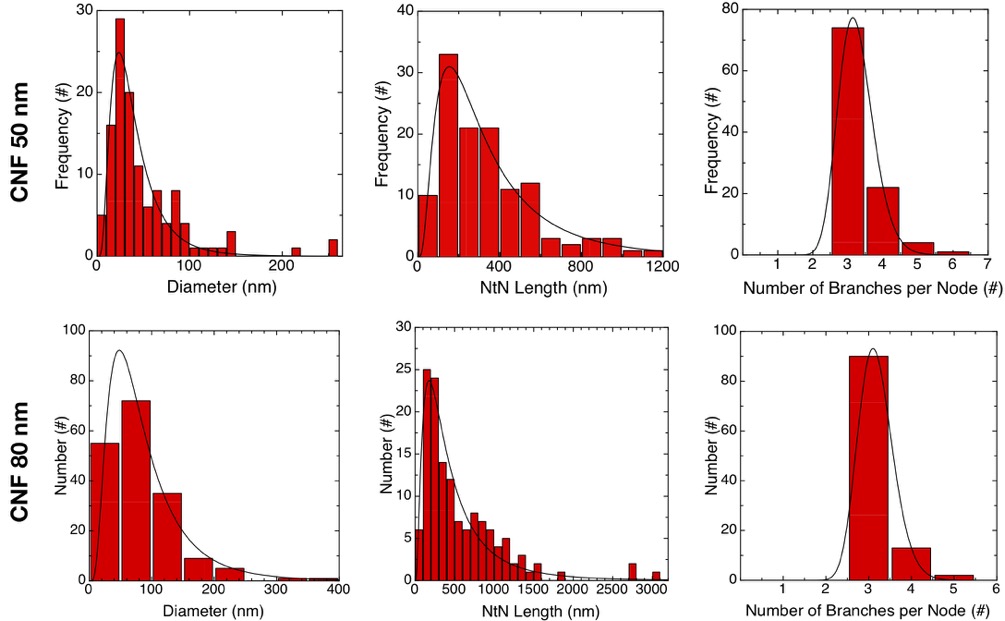


**Figure S2:** The web-like structure quantification for the CNF 50 and CNF80.


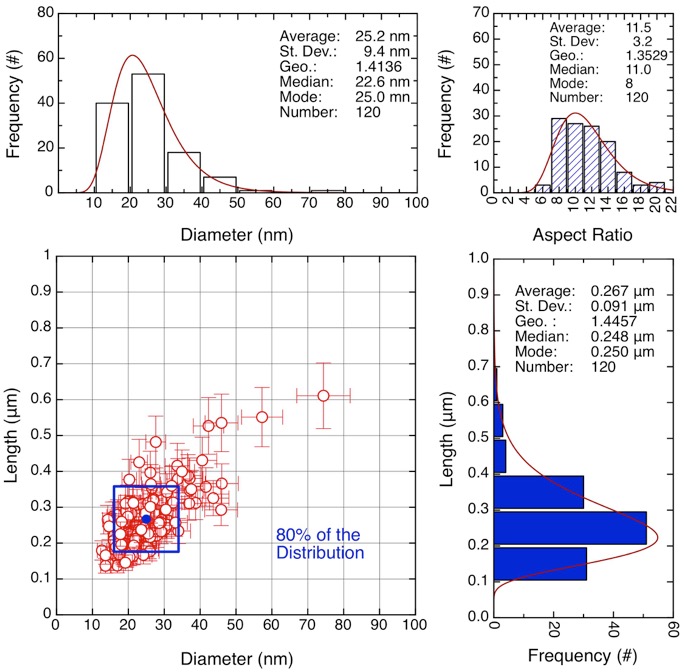


**Figure S3:** The TEM results of CNsC indicating the diameter distribution, the length distribution and the aspect ratio distribution.


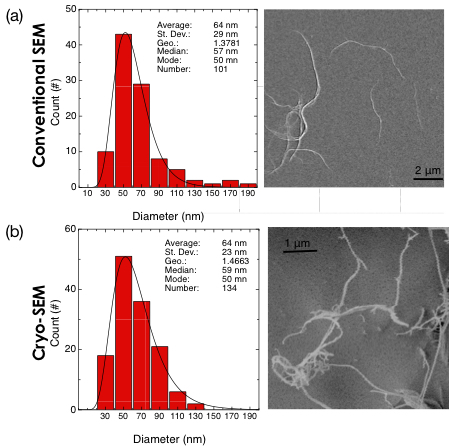


**Figure S4:** The diameter distribution of CNF-50 measured with SEM (a) and cryo-SEM (b).


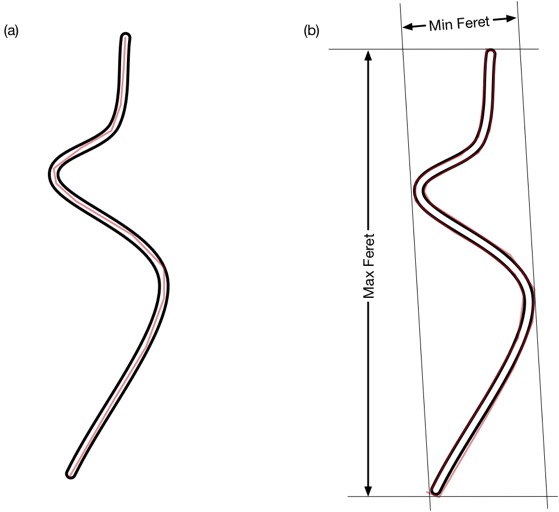


**Figure S5:** Measuring the length of a fibril (a) by tracing the length vs (b) tracing the entire fiber and using the Feret diameters (min and max).

| Cellulose Nanofibrils | **SEM** | | | **TEM** | | |
| --- | --- | --- | --- | --- | --- | --- |
| **Length** | **Diameter** | **Aspect Ratio** | **Diameter** | **NtN Length** | **NFpN** |
| CNF 50 nm | 6710 ± 5611 | 64 ± 29 | 107.6 ± 54.5 | 49.92 ± 43.69 | 335.60 ± 232.66 | 3.33 ± 0.60 |
| CNF 80 nm | 6805 ± 4724 | 78 ± 25 | 85.9 ± 40.5 | 83.23 ± 57.02 | 571 ± 514.71 | 3.16 ± 0.41 |
| Cellulose Nanocrystals | **Length** | **Diameter** | **Aspect Ratio** | **Length** | **Diameter** | **Aspect Ratio** |
| CNC 25 nm | 267 ± 91 | 25 ± 9 | 11.5 ± 3.2 | 287.98 ± 114.42 | 23.24 ± 6.99 | 12.93 ± 5.21 |

**Table S1:** Summary of the morphological characterization data
